# Supplementary material for: Convenient fluorescence detection of Cr(iii) in aqueous solution based on the gold nanoparticle mediated release of the acridine orange probe
Source: Royal Society of Chemistry journal article supplement (doi:10.1039/c7ay00003k), 2017-01-01
Supplement: c7ay00003k1.pdf [file c7ay00003k1.pdf]

1 **Supplementary information (ESI)**

2

3 **Convenient fluorescence detection of Cr(III) in aqueous solution based on the**  
4 **gold nanoparticle mediated release of acridine orange probe**

5

6 **Lizhen Wang, Jinshui Liu\*, Zihan Zhou, Meijiao Xu, Bin Wang**

7 *College of Chemistry and Materials Science, The Key Laboratory of Functional Molecular Solids,*  
8 *Ministry of Education, Anhui Normal University, Wuhu 241000, PR China*

9

10

11

12

13

14

15

16

17

18

19

---

\* Corresponding author. E-mail: jsliu@sina.com

1

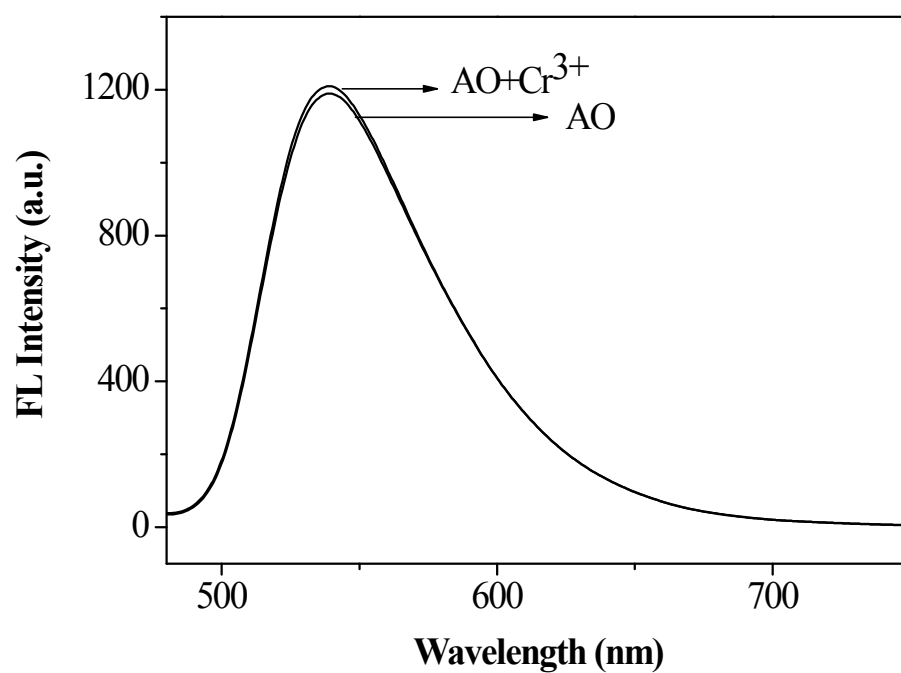

2

3 **Fig. S1** Fluorescence emission spectra of 98 nM AO in the absence and presence of  
4 5 nM Cr<sup>3+</sup> ion.

1

2

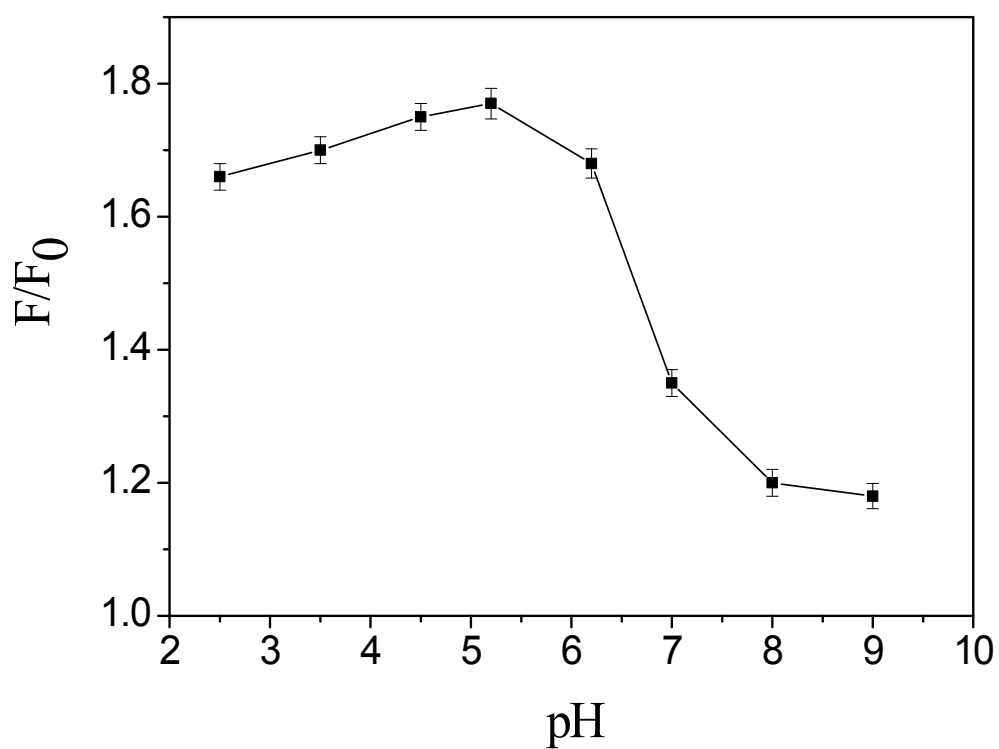

3

4 **Fig. S2** Fluorescence intensity of the AO/AuNPs complex containing of 10  $\mu\text{M}$   $\text{Cr}^{3+}$   
5 ion as a function of pH. The AO concentration was 98 nM, the AuNPs concentration  
6 was 3.5 nM.

1

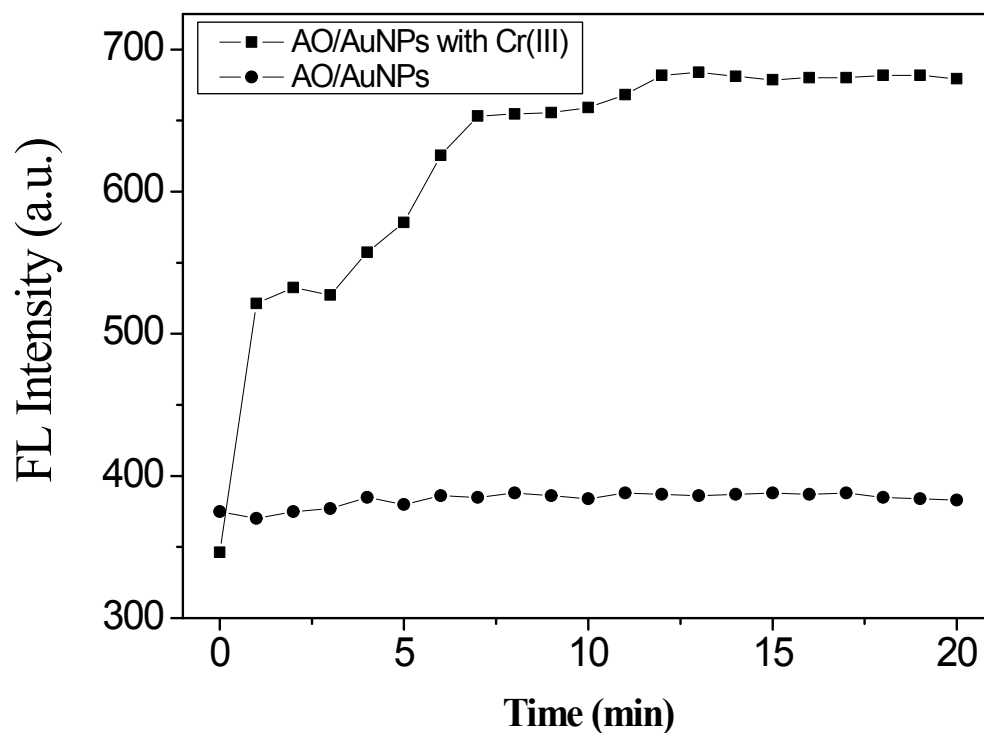

2

3 **Fig. S3** Fluorescence recovery from the AO/AuNPs complex by  $\text{Cr}^{3+}$  ion as a function  
 4 of time. A PBS buffer solution (pH 5.2) was used. The AO concentration was 98 nM,  
 5 the AuNPs concentration was 3.5 nM, the  $\text{Cr}^{3+}$  ion concentration was 10  $\mu\text{M}$ .

1

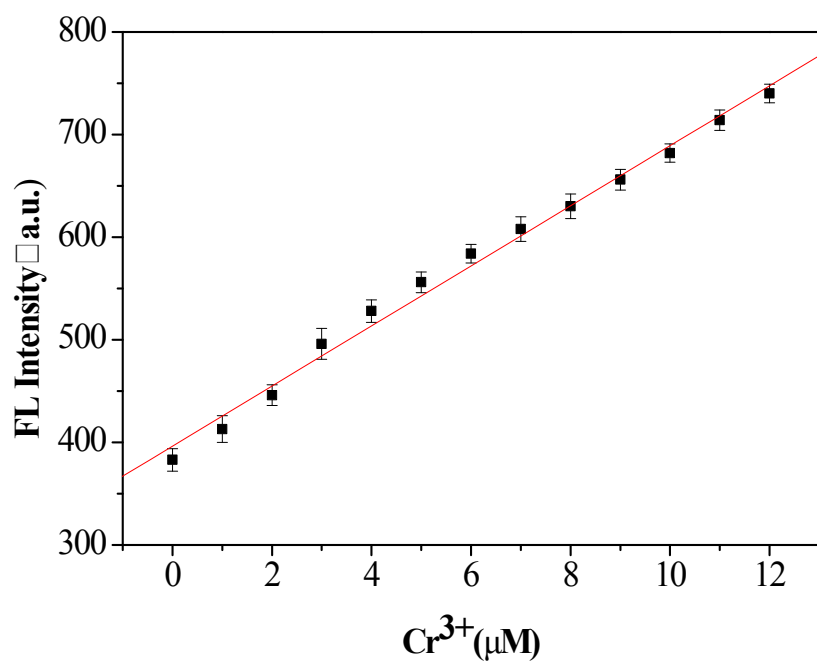

2

3 **Fig. S4** Fluorescence intensity plotted against the  $\text{Cr}^{3+}$  ion concentration. The  
 4 calibration equation was  $F = 396.4 + 29.3C$ , and the correlation coefficient ( $R^2$ ) was  
 5 0.996.

6

7

8
